# Supplementary material
Source: publisher figshare collection journal article supplement (https://sage.figshare.com/ndownloader/files/22068108)
Supplement: Supplementary file 1 [file 22068108]

**Supplementary Table 2.** Mediation analysis predicting tau in FD with age and sex covariates

|                                  | Effect | 95% CI              | SE              | <i>t</i> | <i>p</i> |
|----------------------------------|--------|---------------------|-----------------|----------|----------|
| Total effect                     | 0.09   | [0.03, 0.16]        | 0.03            | 2.98     | .004     |
| Direct effect                    | 0.08   | [0.01, 0.14]        | 0.03            | 2.41     | .018     |
| ADHD diagnosis → Omission errors | 2.84   | [0.42, 5.26]        | 1.22            | 2.32     | .022     |
| Omission errors → Tau in FD      | 0.01   | [0, 0.01]           | 0.00            | 2.76     | .007     |
|                                  | Effect | Bootstrap<br>95% CI | Bootstrap<br>SE |          |          |
| Total indirect effect            | 0.02   | [0, 0.05]           | 0.01            |          |          |

*Note.* Coefficients for the model testing the mediating effect of omission errors on the relationship between ADHD diagnosis and tau in framewise displacement (FD) with age and sex covariates. 95% confidence intervals (CI) for indirect effect based on 5000 bootstrap samples. SE, standard error.
